# Supplementary material
Source: publisher figshare collection journal article supplement (https://aacr.figshare.com/articles/dataset/_/22440982)
Supplement: Supplementary file 1 [file 39891850]

**A**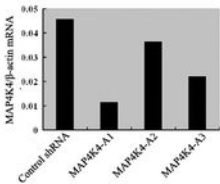**B**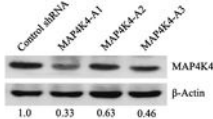

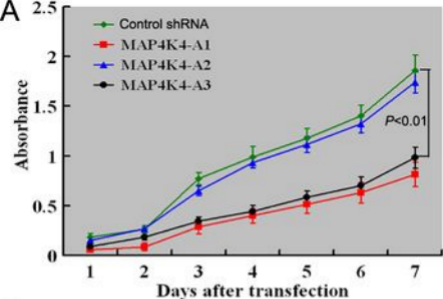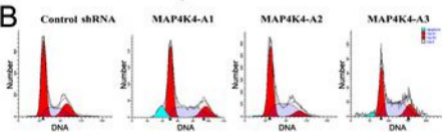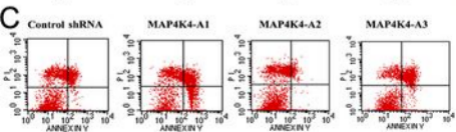

## Supplementary Figure Legends

Supplementary Fig. 1. Downregulation of endogenous MAP4K4 expression in HepG2 cells by specific shRNAs. qRT-PCR and Western blot analyses of the MAP4K4 mRNA (**A**) and protein (**B**) expression in HepG2 cells stably expressing indicated shRNA plasmids. The values below representative Western bands in **B** indicate the relative MAP4K4 protein levels normalized to  $\beta$ -actin.

Supplementary Fig. 2. ShRNA-mediated silencing of MAP4K4 in Hep3B cells. Hep3B cells at approximately 60% confluence were transiently transfected with MAP4K4-shRNAs (MAP4K4-A1, -A2, and -A3) or control shRNA using Lipofectamine 2000. **A**, Assessment of cell proliferation by the MTT assay. Hep3B cells expressing MAP4K4-A1 or MAP4K4-A3 shRNAs showed a significantly ( $P<0.01$ ) lower proliferation rate compared to those harboring MAP4K4-A2 or scrambled control shRNAs.  $n=6$ ; error bars, SD. **B**, Analysis of cell cycle distribution of Hep3B cells expressing indicated shRNAs. Representative flow cytometry histograms of PI-stained cells are demonstrated. **C**, Representative flow cytometry dot plots of Hep3B cells expressing indicated shRNAs. Early apoptotic cells (Annexin V-FITC positive, PI negative) were increased in MAP4K4-A1- and MAP4K4-A3-producing cells compared to MAP4K4-A2 or control transfectants.

## Supplementary Methods

**Cell culture.** Four human HCC cell lines HepG2, Huh 7, Hep3B, and SMMU-7721 were purchased from Institute of Cellular Research, Chinese Academy of Science (Shanghai, China) and were cultured in Dulbecco's modified Eagle's medium (DMEM) with 10% fetal bovine serum (Gibco BRL, Carpinteria, CA, USA), 50U/ml penicillin, and 50 mg/ml streptomycin in a 5% CO<sub>2</sub> incubator at 37°C.

**Generation of stable shRNA-expressing clones.** Three shRNAs targeting different regions of the *MAP4K4* transcript were designed following the rules of Tuschl T (1), and their sense sequences were as follows: MAP4K4-A1, 5'-GGGAAGGTCTATCCTCTTATCAAGAGTAAGAGGATAGACCTTCCC-3'; MAP4K4-A2, 5'-GCAGCAGTCAGGTTTATTTTCATCAAGAGTGAAATAAACCTGACTGCTGC-3'; and MAP4K4-A3, 5'-GCGGAGAAATACGTTTCATAGGTCAAGAGCCTATGAACGTATTTCTCCGC-3'. A negative scrambled control shRNA was purchased from Santa Cruz Biotechnology (sc-108060; Santa Cruz, CA, USA). The shRNAs were separately cloned into pSilencer-2.1-U6 vector (GenScript, Piscataway, NJ, USA), and the resultant constructs (pSilencer-2.1-A1, -A2 and -A3) were verified by DNA sequencing by Shanghai Invitrogen Biotechnology Company (Shanghai, China). For generation of stable transfectants, HepG2 and Hep3B cells at 70-80% confluence

were separately transfected with pSilencer-2.1-A1, -A2 or -A3 using Lipofectamine 2000 (Invitrogen) according to the manufacturer's instructions. After 48 h of transfection, cells were cultured in selection medium containing G418 (400 µg/ml) for 14 days. G418-resistant colonies transfected with the same shRNA were pooled together, and 3 stable cell pools for each of the two HCC cell lines were finally obtained, expressing MAP4K4-A1, -A2 and -A3, respectively. Stable transfectants expressing the scrambled control shRNA were generated similarly. The expression of endogenous MAP4K4 was determined by qRT-PCR and western blot analyses.

***Proliferation assay.*** Cell proliferation was analyzed by a modified tetrazolium salt (MTT) assay (2). HepG2 and Hep3B cells stably transfected with shRNAs or empty vector were separately seeded at a density of  $1.5 \times 10^3$  cells per well in 96-well microplates, and harvested daily for up to 7 days. The number of viable cells was determined using Cell Titer 96 Non-Radioactive Cell Proliferation Assay (Promega, Madison, WI, USA) according to the manufacturer's protocol. The reduced MTT product was dissolved in 2% dimethylsulfoxide, and the absorbance at 570 nm was measured on a Bio-Rad Microplate Reader (Bio-Rad, Hercules, CA). Each time point was done in sextuplicate wells and experiments were repeated three times.

***Colony-forming assay.*** Detailed experimental procedures have been described previously (3). Briefly, HepG2 cells stably transfected with shRNAs or empty vector were plated in 6-well plates at a density of 1,000 cells per well. After 10 days, cells

were washed with PBS, fixed in 10% methanol for 15 min, and stained in Giemsa for 20 min. Colonies that consisted of >50 cells were scored. Each experiment was repeated at least three times.

***Cell cycle and apoptosis analysis.*** Cell cycle distribution was analyzed by flow cytometry as described previously (4). HepG2 and Hep3B cells stably transfected with shRNAs or empty vector were trypsinized, fixed in 70% ethanol, and incubated with 0.5 mg/ml of propidium iodide (PI) along with 0.1 mg/ml of RNase A (Calbiochem, San Diego, CA, USA). For apoptosis analysis, cells were stained with Annexin V/FITC kit (LHK601-100, MBI) in accordance with the manufacturer's instructions. Data acquisition and analysis were done using a FACSort Cytometer (FACSCA, New York, USA) with Multicycle software (Phoenix Flow Systems, San Diego, CA, USA). Experiments were replicated at least three times.

***Quantitative reverse transcription-polymerase chain reaction (qRT-PCR).*** Total RNA was isolated using TRIzol (Invitrogen, Carlsbad, CA, USA) according to the manufacturer's instructions. The complementary DNA (cDNA) was reverse-transcribed from 2 µg of total RNA by SuperScript first-strand synthesis system for RT-PCR (Invitrogen). Real-time qPCR was performed on an ABI-7500 Sequence Detection System (Applied Biosystems, Foster City, CA, USA) using SYBR Green PCR Master Mix (Life Technologies Corporation, Foster City, CA, USA). Primer sequences used in this study included *MAP4K4* forward:

5'-ACAGAGAGTGGCCTGATGCT-3', *MAP4K4* reverse: 5'-ATC CTT CCA AAT CCC CTA CG-3'; and *β-actin* forward: 5'-GAG CGG GAA ATC GTG CGT GAC ATT-3', *β-actin* reverse: 5'-GAT GGA GTT GAA GGT AGT TTC GTG-3'. All samples were run in triplicate. Gene expression was normalized to the housekeeping gene *β-actin* transcripts, and the relative mRNA expression between the non-tumor and tumor samples were calculated using the  $2^{-\Delta\Delta Ct}$  method (5).

***Antibodies and Western blot analysis.*** Western blotting was performed as described in ref. 6. Primary antibodies included anti-MAP4K4 (HGK, sc-25738; 1:500), anti-p-p38 (Thr 180, sc-101759; 1:500), anti-p38 $\alpha$  (N-20, sc-728; 1:500), anti-p-ERK1/2 (Thr 202, sc-101760; 1:500) , anti-ERK1/2 (C-14, sc-154; 1:500), anti-p-JNK (G-7, sc-6254; 1:500), anti-JNK (D-2, sc-7345; 1:500), anti-p-NF $\kappa$ B p65 (Ser 276, sc-101749; 1:500), anti-NF $\kappa$ B p65 (F-6, sc-8008; 1:500), anti-TLR5 (H-127, sc-10742; 1:500), anti-TLR4 (H-80, sc-10741; 1:500), anti-MyD88 (HFL-296, sc-11356; 1:500), anti-TRAF6 (D-10, sc-8409; 1:500), and anti- $\beta$ -actin (C4, sc-47778; 1:500). Equal amounts of protein (50  $\mu$ g) was loaded, separated by sodium dodecyl sulfate-polyacrylamide gel electrophoresis (SDS-PAGE), and transferred onto polyvinylidene difluoride membranes. After blocking, the membranes were probed with primary antibody overnight at 4°C, followed by incubation with appropriate secondary antibody for 1 h. All antibodies were obtained from Santa Cruz Biotechnology. Blots were developed using an enhanced chemiluminescence kit from Santa Cruz Biotechnology. The intensities of immunoreactive bands were measured

by computerized image analysis (QuantityOne-software, Bio-Rad, Hercules, CA, USA) and normalized to  $\beta$ -actin levels.

***Immunohistochemistry.*** Immunohistochemical staining for MAP4K4 was performed as described earlier (7). Briefly, paraffin sections (4  $\mu$ m thick) were deparaffinized with xylene, rehydrated, and heated for 10 min in a steamer containing 10 mmol/L of sodium citrate (pH 6.0) to retrieve antigen. Endogenous peroxidase was quenched with 3% hydrogen peroxide for 10 min. Sections were incubated with rabbit polyclonal anti-MAP4K4 (HGK, sc-25738; 1:50) for 1 h, followed by the secondary reaction with DAKO Envision+ Reagent (DakoCytomation, Carpinteria, CA, USA). Negative controls were included by omitting the primary antibody, and a known positive control was included with each batch. The stained sections were independently assessed by two pathologists without prior knowledge of the clinical data. The mean percentage of immunoreactive cells in 5 representative areas of the slides was determined. Stained cells in most of the slides showed comparable immunoreactivity for MAP4K4 regardless of the percentage of positive cells; therefore, we did not take the intensity of staining into account. In accordance with the methods reported previously (7), the median percentage of immunostained tumor cells (10%) was used as a cutoff. High expression of MAP4K4 (MAP4K4-H) was defined as cytoplasmic staining of  $\geq 10\%$  of the tumor cells and low expression of MAP4K4 (MAP4K4-L) was defined as cytoplasmic staining of  $< 10\%$  of the tumor cells or no cytoplasmic staining. Association between MAP4K4 expression and



clinicopathological parameters were then analyzed.

1. Tuschl T. Expanding small RNA interference. *Nat Biotechnol* 2002;20:446-448.
2. Carmichael J, Mitchell JB, DeGraff WG, et al. Chemosensitivity testing of human lung cancer cell lines using the MTT assay. *Br J Cancer* 1988;57:540-547.
3. Wang X, Jin DY, Wong HL, Feng H, Wong YC, Tsao SW. MAD2-induced sensitization to vincristine is associated with mitotic arrest and Raf/Bcl-2 phosphorylation in nasopharyngeal carcinoma cells. *Oncogene* 2003;22:109-116.
4. Zhu Z, Luo Z, Li Y, Ni C, Li H, Zhu M. Human inhibitor of growth 1 inhibits hepatoma cell growth and influences p53 stability in a variant-dependent manner. *Hepatology* 2009;49:504-512.
5. Livak KJ, Schmittgen TD. Analysis of relative gene expression data using real-time quantitative PCR and the 2(-Delta Delta C(T)) Method. *Methods* 2001;25:402-408.
6. Collins CS, Hong J, Sapinoso L, et al. A small interfering RNA screen for modulators of tumor cell motility identifies MAP4K4 as a promigratory kinase. *Proc Natl Acad Sci U S A* 2006;103:3775-3780.
7. Liang JJ, Wang H, Rashid A, et al. Expression of MAP4K4 is associated with worse prognosis in patients with stage II pancreatic ductal adenocarcinoma. *Clin Cancer Res* 2008;14:7043-7049.

**Supplementary Table 1. Clinicopathologic factors of two cohorts of patients with pathologically diagnosed HCC**

| Variables                                              | Cohort A (n=20), no. cases | Cohort B (n=400), no. cases |
|--------------------------------------------------------|----------------------------|-----------------------------|
| Sex (male/female)                                      | 14/6                       | 286/114                     |
| Median (range) age, y                                  | 51 (29-76)                 | 50 (27-78)                  |
| Serum AFP level ( $\geq 20$ / $< 20$ $\mu\text{g/l}$ ) | 13/7                       | 263/137                     |
| Serum HBsAg (positive/negative)                        | 14/6                       | 305/95                      |
| Serum HBeAg (positive/negative)                        | 12/8                       | 245/155                     |
| Tumor size ( $> 2$ / $\leq 2$ cm)                      | 16/4                       | 343/57                      |
| Histological grade<br>(well/moderate/poor)             | 3/10/7                     | 95/236/69                   |
| Liver cirrhosis (absent/present)                       | 13/7                       | 125/275                     |
| Tumor capsule<br>(intact/absent, not intact)           | 4/16                       | 79/321                      |
| Intrahepatic metastasis<br>(absent/present)            | 5/15                       | 126/247                     |
| TNM stage<br>(I + II/III + IV)                         | 3/17                       | 85/315                      |

Supplementary Table 2. Genes on human TLR signaling pathway PCR arrays whose expression is regulated by MAP4K4 silencing in HepG2 cells

| Position | GenBank no. | Symbol | Description                                          | Gene name             | Fold change<br>(MAP4K4-A1/control shRNA transfectants) |                        |                        |                            |
|----------|-------------|--------|------------------------------------------------------|-----------------------|--------------------------------------------------------|------------------------|------------------------|----------------------------|
|          |             |        |                                                      |                       | Sample 1/<br>control 1                                 | Sample 2/<br>control 2 | Sample 3/<br>control 3 | mean±Standard<br>deviation |
| A01      | NM_000061   | BTK    | Bruton agammaglobulinemia tyrosine kinase            | AGMX1/AT              | -1.87                                                  | -1.74                  | -1.66                  | -1.76±0.11                 |
| A02      | NM_001228   | CASP8  | Caspase 8, apoptosis-related cysteine peptidase      | ALPS2B/CAP4           | -1.01                                                  | -1.61                  | -1.01                  | -1.21±0.35                 |
| A03      | NM_002982   | CCL2   | Chemokine (C-C motif) ligand 2                       | GDCF-2/GDCF-2<br>HC11 | -12.43                                                 | -18.15                 | -14.3                  | -14.96±2.93                |
| A04      | NM_000591   | CD14   | CD14 molecule                                        | CD14                  | -2.29                                                  | -2.03                  | -2.15                  | -2.16±0.13                 |
| A05      | NM_005191   | CD80   | CD80 molecule                                        | CD28LG/CD28LG1        | 1.85                                                   | 1.64                   | 1.34                   | 1.61±0.26                  |
| A06      | NM_006889   | CD86   | CD86 molecule                                        | B7-2/B70              | -1.31                                                  | -1.2                   | -1.03                  | -1.18±0.14                 |
| A07      | NM_001278   | CHUK   | Conserved helix-loop-helix ubiquitous kinase         | IKBKA/IKK-alpha       | -3.21                                                  | -5.29                  | -4.80                  | -4.43±1.09                 |
| A08      | NM_014358   | CLEC4E | C-type lectin domain family 4, member E              | CLECSF9/MINCLE        | -3.13                                                  | -4.50                  | -3.80                  | -3.89±0.81                 |
| A09      | NM_000758   | CSF2   | Colony stimulating factor 2 (granulocyte-macrophage) | GMCSF                 | -3.82                                                  | -2.71                  | -3.08                  | -3.20±0.57                 |
| A10      | NM_000759   | CSF3   | Colony stimulating factor 3 (granulocyte)            | G-CSF/GCSF            | -2.03                                                  | -1.99                  | -2.03                  | -2.02±0.02                 |

|     |           |         |                                                                            |                     |       |       |       |            |
|-----|-----------|---------|----------------------------------------------------------------------------|---------------------|-------|-------|-------|------------|
| A11 | NM_001565 | CXCL10  | Chemokine (C-X-C motif) ligand 10                                          | C7/IFI10            | -3.66 | -5.09 | -4.74 | -4.50±0.75 |
| A12 | NM_002759 | EIF2AK2 | Eukaryotic translation initiation factor 2-alpha kinase 2                  | EIF2AK1/PKR         | -1.05 | -1.87 | -1.14 | -1.35±0.45 |
| B01 | NM_005229 | ELK1    | ELK1, member of ETS oncogene family                                        | Elk1                | -4.45 | -6.92 | -5.31 | -5.56±1.25 |
| B02 | NM_003824 | FADD    | Fas (TNFRSF6)-associated death domain                                      | GIG3/MORT1          | -1.32 | -1.04 | -1.04 | -1.13±0.16 |
| B03 | NM_005252 | FOS     | V-fos FBJ murine osteosarcoma viral oncogene homolog                       | c-fos               | -5.19 | -4.59 | -4.07 | -4.61±0.56 |
| B04 | NM_002128 | HMGB1   | High-mobility group box 1                                                  | DKFZp686A04236/HMG1 | -5.55 | -6.4  | -6.82 | -6.26±0.55 |
| B05 | NM_005343 | HRAS    | V-Ha-ras Harvey rat sarcoma viral oncogene homolog                         | CTLO/HRAS1          | -1.11 | -1.75 | -1.66 | -1.51±0.35 |
| B06 | NM_005345 | HSPA1A  | Heat shock 70kDa protein 1A                                                | HSP70-1/HSP72       | 4.99  | 4.82  | 4.13  | 4.65±0.46  |
| B07 | NM_002156 | HSPD1   | Heat shock 60kDa protein 1 (chaperonin)                                    | CPN60/GROEL         | -1.49 | -1.28 | -1.33 | -1.37±0.11 |
| B08 | NM_024013 | IFNA1   | Interferon, alpha 1                                                        | IFL/IFN             | -2.76 | -2.83 | -2.63 | -2.74±0.10 |
| B09 | NM_002176 | IFNB1   | Interferon, beta 1, fibroblast                                             | IFB/IFF             | -3.61 | -2.31 | -3.28 | -3.07±0.68 |
| B10 | NM_000619 | IFNG    | Interferon, gamma                                                          | IFG/IFI             | -1.30 | -1.18 | -1.03 | -1.17±0.14 |
| B11 | NM_001556 | IKBKB   | Inhibitor of kappa light polypeptide gene enhancer in B-cells, kinase beta | IKK-beta/IKK2       | -1.85 | -3.13 | -2.01 | -2.33±0.70 |
| B12 | NM_000572 | IL10    | Interleukin 10                                                             | CSIF/IL-10          | -1.86 | -1.03 | -1.24 | -1.38±0.43 |
| C01 | NM_000882 | IL12A   | Interleukin 12A (natural killer cell stimulatory factor 1, cytotoxic       | CLMF/IL-12A         | -2.84 | -3.86 | -3.44 | -3.38±0.51 |

|     |           |        |                                               |               |       |       |        |             |  |
|-----|-----------|--------|-----------------------------------------------|---------------|-------|-------|--------|-------------|--|
|     |           |        | lymphocyte maturation factor 1, p35)          |               |       |       |        |             |  |
| C02 | NM_000575 | IL1A   | Interleukin 1, alpha                          | IL-1A/IL1     | -6.63 | -4.87 | -6.84  | -6.11±1.08  |  |
| C03 | NM_000576 | IL1B   | Interleukin 1, beta                           | IL-1/IL1-BETA | -1.88 | -1.45 | -1.92  | -1.75±0.26  |  |
| C04 | NM_000586 | IL2    | Interleukin 2                                 | IL-2/TCGF     | -2.46 | -1.05 | -1.03  | -1.51±0.82  |  |
| C05 | NM_000600 | IL6    | Interleukin 6 (interferon, beta 2)            | BSF2/HGF      | -1.06 | -2.45 | -2.66  | -2.06±0.87  |  |
| C06 | NM_000584 | IL8    | Interleukin 8                                 | 3-10C/AMCF-I  | -2.30 | -1.70 | -2.11  | -2.04±0.31  |  |
| C07 | NM_001569 | IRAK1  | Interleukin-1 receptor-associated kinase 1    | IRAK/pelle    | -7.54 | -8.66 | -8.71  | -8.30±0.66  |  |
| C08 | NM_001570 | IRAK2  | Interleukin-1 receptor-associated kinase 2    | IRAK-2        | -4.59 | -2.92 | -3.96  | -3.82±0.84  |  |
| C09 | NM_002198 | IRF1   | Interferon regulatory factor 1                | IRF-1/MAR     | -1.08 | -1.26 | -1.65  | -1.33±0.29  |  |
| C10 | NM_001571 | IRF3   | Interferon regulatory factor 3                | IRF-3         | -2.08 | -2.95 | -2.42  | -2.48±0.44  |  |
| C11 | NM_002228 | JUN    | Jun oncogene                                  | AP1/c-Jun     | -1.12 | -1.61 | -1.65  | -1.46±0.30  |  |
| C12 | NM_000595 | LTA    | Lymphotoxin alpha (TNF superfamily, member 1) | LT/TNFB       | -1.69 | -4.46 | -2.75  | -2.97±1.40  |  |
| D01 | NM_005582 | CD180  | CD180 molecule                                | LY64/Ly78     | -1.12 | -1.32 | -1.5   | -1.31±0.19  |  |
| D02 | NM_004271 | LY86   | Lymphocyte antigen 86                         | MD-1/MMD-1    | -1.24 | -1.33 | -1.03  | -1.20±0.15  |  |
| D03 | NM_015364 | LY96   | Lymphocyte antigen 96                         | MD-2          | -3.33 | -5.71 | -4.94  | -4.66±1.21  |  |
| D04 | NM_002756 | MAP2K3 | Mitogen-activated protein kinase 3            | MAPKK3/MEK3   | 1.81  | 1.78  | 1.61   | 1.74±0.11   |  |
| D05 | NM_003010 | MAP2K4 | Mitogen-activated protein kinase 4            | JNKK/JNKK1    | -5.67 | -4.70 | -5.10  | -5.16±0.49  |  |
| D06 | NM_005921 | MAP3K1 | Mitogen-activated protein kinase kinase 1     | MAPKKK1/MEKK  | -36.8 | -43.6 | -40.45 | -40.28±3.40 |  |
| D07 | NM_003188 | MAP3K7 | Mitogen-activated protein kinase              | TAK1/TGF1a    | -2.24 | -2.66 | -2.66  | -2.52±0.24  |  |

---

|     |           |           |                                                                                     |                      |        |        |        |             |  |
|-----|-----------|-----------|-------------------------------------------------------------------------------------|----------------------|--------|--------|--------|-------------|--|
|     |           |           | kinase kinase 7                                                                     |                      |        |        |        |             |  |
| D08 | NM_006116 | MAP3K7IP1 | Mitogen-activated protein kinase 3'-Tab1/TAB1                                       |                      | -3.48  | -2.69  | -3.28  | -3.15±0.41  |  |
| D09 | NM_004834 | MAP4K4    | kinase kinase 7 interacting protein 1<br>Mitogen-activated protein kinase           | FLH21957/HGK         | -1.04  | -1.47  | -1.99  | -1.50±0.48  |  |
| D10 | NM_002750 | MAPK8     | kinase kinase 4<br>Mitogen-activated protein kinase 8                               | JNK/JNK1             | -10.57 | -16.54 | -18.66 | -15.26±4.19 |  |
| D11 | NM_015133 | MAPK8IP3  | Mitogen-activated protein kinase 8                                                  | DKFZp762N1113/JI     | -2.2   | -2.28  | -2.02  | -2.17±0.13  |  |
| D12 | NM_002468 | MYD88     | interacting protein 3<br>Myeloid differentiation primary response gene (88)         | MyD88                | -14.82 | -12.91 | -14.5  | -14.08±1.02 |  |
| E01 | NM_003998 | NFKB1     | Nuclear factor of kappa light polypeptide gene enhancer in B-cells 1 (p105)         | DKFZp686C01211/EBP-1 | -2.36  | -3.49  | -2.97  | -2.94±0.57  |  |
| E02 | NM_002502 | NFKB2     | Nuclear factor of kappa light polypeptide gene enhancer in B-cells 2 (p49/p100)     | LYT-10/LYT10         | -1.02  | -3.13  | -2.2   | -2.12±1.06  |  |
| E03 | NM_020529 | NFKBIA    | Nuclear factor of kappa light polypeptide gene enhancer in B-cells inhibitor, alpha | IKBA/MAD-3           | -1.1   | -2.02  | -1.72  | -1.61±0.47  |  |
| E04 | NM_005007 | NFKBIL1   | Nuclear factor of kappa light polypeptide gene enhancer in B-cells inhibitor-like 1 | IKBL/LST1            | -5.9   | -4.62  | -4.31  | -4.94±0.84  |  |
| E05 | NM_006165 | NFRKB     | Nuclear factor related to kappaB binding protein                                    | DKFZp547B2013        | -4.69  | -4.21  | -4.18  | -4.36±0.29  |  |
| E06 | NM_003298 | NR2C2     | Nuclear receptor subfamily 2, group C, member 2                                     | TAK1/TR2R1           | -3.99  | -3.98  | -4.35  | -4.11±0.21  |  |

---

|     |           |        |                                                                                                                                         |                |       |       |       |            |
|-----|-----------|--------|-----------------------------------------------------------------------------------------------------------------------------------------|----------------|-------|-------|-------|------------|
| E07 | NM_020651 | PELI1  | Pellino homolog 1 (Drosophila)                                                                                                          | DKFZp686C18116 | -2.96 | -3.74 | -3.71 | -3.47±0.44 |
| E08 | NM_005036 | PPARA  | Peroxisome proliferative activated receptor, alpha                                                                                      | NR1C1/PPAR     | -3.18 | -3.56 | -3.93 | -3.55±0.37 |
| E09 | NM_003690 | PRKRA  | Protein kinase, interferon-inducible double stranded RNA dependent activator                                                            | HSD14/PACT     | -4.22 | -3.08 | -3.24 | -3.51±0.62 |
| E10 | NM_000963 | PTGS2  | Prostaglandin-endoperoxide synthase 2 (prostaglandin G/H synthase and cyclooxygenase)                                                   | COX-2/COX2     | 1.09  | -1.03 | -1.03 | -0.32±1.22 |
| E11 | NM_002908 | REL    | V-rel reticuloendotheliosis viral oncogene homolog (avian)                                                                              | C-Rel          | -3.95 | -3.14 | -3.09 | -3.39±0.48 |
| E12 | NM_021975 | RELA   | V-rel reticuloendotheliosis viral oncogene homolog A, nuclear factor of kappa light polypeptide gene enhancer in B-cells 3, p65 (avian) | NFKB3          | -2.75 | -2.32 | -2.75 | -2.61±0.25 |
| F01 | NM_003821 | RIPK2  | Receptor-interacting serine-threonine kinase 2                                                                                          | CARD3/CARDIAK  | -5.62 | -3.27 | -4.58 | -4.49±1.18 |
| F02 | NM_015077 | SARM1  | Sterile alpha and TIR motif containing 1                                                                                                | SAMD2/SARM     | -1.90 | -1.68 | -1.56 | -1.71±0.17 |
| F03 | NM_021805 | SIGIRR | Single immunoglobulin and toll-interleukin 1 receptor (TIR) domain                                                                      | TIR8           | -1.28 | -1.09 | -1.24 | -1.20±0.10 |
| F04 | NM_016581 | ECSIT  | ECSIT homolog (Drosophila)                                                                                                              | SITPEC         | -2.46 | -4.10 | -3.54 | -3.37±0.84 |
| F05 | NM_013254 | TBK1   | TANK-binding kinase 1                                                                                                                   | NAK/T2K        | -3.74 | -2.55 | -3.17 | -3.15±0.76 |
| F06 | NM_021649 | TICAM2 | Toll-like receptor adaptor molecule 2                                                                                                   | TICAM-2/TIRAP3 | 1.89  | 1.73  | 1.81  | 1.81±0.08  |

|     |              |          |                                                                     |                     |        |        |        |              |
|-----|--------------|----------|---------------------------------------------------------------------|---------------------|--------|--------|--------|--------------|
| F07 | NM_001039661 | TIRAP    | Toll-interleukin 1 receptor (TIR) domain containing adaptor protein | Mal/wyatt           | -1.48  | -1.08  | -1.14  | -1.23±0.22   |
| F08 | NM_003263    | TLR1     | Toll-like receptor 1                                                | CD281/DKFZp547I0610 | 1.88   | 1.86   | 1.29   | 1.68±0.34    |
| F09 | NM_030956    | TLR10    | Toll-like receptor 10                                               | CD290               | -5.80  | -9.13  | -6.52  | -7.15±1.75   |
| F10 | NM_003264    | TLR2     | Toll-like receptor 2                                                | CD282/TIL4          | 1.51   | 1.19   | 1.08   | 1.26±0.22    |
| F11 | NM_003265    | TLR3     | Toll-like receptor 3                                                | CD283               | -2.15  | -5.27  | -3.77  | -3.73±1.56   |
| F12 | NM_138554    | TLR4     | Toll-like receptor 4                                                | ARMD10/CD284        | -18.26 | -23.57 | -19.48 | -20.44±2.78  |
| G01 | NM_003268    | TLR5     | Toll-like receptor 5                                                | SLEB1/TIL3          | -61.89 | -37.65 | -51.04 | -50.19±12.14 |
| G02 | NM_006068    | TLR6     | Toll-like receptor 6                                                | CD286               | -2.18  | -1.84  | -2.64  | -2.22±0.40   |
| G03 | NM_016562    | TLR7     | Toll-like receptor 7                                                | TLR7                | -3.50  | -19.04 | -10.2  | -10.91±7.79  |
| G04 | NM_138636    | TLR8     | Toll-like receptor 8                                                | CD288               | -8.03  | -6.78  | -9.72  | -8.18±1.48   |
| G05 | NM_017442    | TLR9     | Toll-like receptor 9                                                | CD289               | -1.22  | -1.31  | -1.03  | -1.19±0.14   |
| G06 | NM_000594    | TNF      | Tumor necrosis factor (TNF superfamily, member 2)                   | DIF/TNF-alpha       | 1.92   | 1.10   | 1.09   | 1.37±0.48    |
| G07 | NM_001065    | TNFRSF1A | Tumor necrosis factor receptor superfamily, member 1A               | CD120a/FPF          | 1.02   | -1.08  | -1.03  | -0.36±1.20   |
| G08 | NM_019009    | TOLLIP   | Toll interacting protein                                            | IL-1RAcPIP          | -1.26  | -3.84  | -2.08  | -2.39±1.32   |
| G09 | NM_004620    | TRAF6    | TNF receptor-associated factor 6                                    | MGC:3310/RNF85      | -3.16  | -2.18  | -2.47  | -2.60±0.50   |
| G10 | NM_182919    | TICAM1   | Toll-like receptor adaptor molecule 1                               | PRVTIRB/TICAM-1     | -4.72  | -2.67  | -3.24  | -3.54±1.06   |
| G11 | NM_003348    | UBE2N    | Ubiquitin-conjugating enzyme E2N (UBC13 homolog, yeast)             | UBC13/UbcH-ben      | -8.63  | -3.8   | -6.43  | -6.29±2.42   |
| G12 | NM_021988    | UBE2V1   | Ubiquitin-conjugating enzyme E2 variant 1                           | CIR1/CROC-1         | -1.44  | -2.48  | -1.64  | -1.85±0.55   |
| H01 | NM_004048    | B2M      | Beta-2-microglobulin                                                | B2M                 | -4.61  | -2.98  | -3.51  | -3.70±0.83   |



|     |           |        |                                                                     |                 |       |       |       |            |
|-----|-----------|--------|---------------------------------------------------------------------|-----------------|-------|-------|-------|------------|
| H02 | NM_000194 | HPRT1  | Hypoxanthine<br>phosphoribosyltransferase<br>(Lesch-Nyhan syndrome) | HGPRT/HPRT<br>1 | -1.08 | -1.57 | -1.40 | -1.35±0.25 |
| H03 | NM_012423 | RPL13A | Ribosomal protein L13a                                              | RPL13A          | -1.14 | -1.72 | -1.65 | -1.50±0.32 |
| H04 | NM_002046 | GAPDH  | Glyceraldehyde-3-phosphate<br>dehydrogenase                         | G3PD/GAPD       | -1.34 | -1.15 | -1.03 | -1.17±0.16 |
| H05 | NM_001101 | ACTB   | Actin, beta                                                         | PS1TP5BP1       | 1.45  | 1.80  | 1.45  | 1.57±0.20  |

**Supplementary Table 3. Effects of MAP4K4 downregulation on cell cycle distribution and apoptotic index in HepG2 cells stably expressing indicated shRNAs**

| Groups        | G0-G1 (%)    | S phase (%)  | G2/M (%)    | Apoptotic index (%) |
|---------------|--------------|--------------|-------------|---------------------|
| Control shRNA | 58.87±5.34   | 28.75±3.41   | 12.38±1.92  | 4.557±0.79          |
| MAP4K4-A1     | 20.16±2.65** | 61.06±0.95** | 18.78±3.59* | 22.46±2.73**        |
| MAP4K4-A2     | 59.30±3.68   | 22.38±6.68   | 18.31±3.01* | 5.470±0.77          |
| MAP4K4-A3     | 41.07±3.82** | 43.48±1.72** | 15.45±2.10  | 11.06±1.31*         |

NOTE: Values are presented as mean and SD of three independent experiments.

\* $P < 0.05$ , \*\* $P < 0.01$ , compared to the control shRNA-expressing transfectants.

**Supplementary Table 4. Effects of MAP4K4 knockdown on gene expression in**

**HepG2 cells**

| TLRs                 | Adaptors & TLR interacting proteins | Effectors                         | NFκB pathway                                                                      | JNK/p38 pathway       | NF/IL6 pathway | IRF pathway | Regulation of adaptive immunity | Fold change    |
|----------------------|-------------------------------------|-----------------------------------|-----------------------------------------------------------------------------------|-----------------------|----------------|-------------|---------------------------------|----------------|
| TLR5<br>TLR4<br>TLR7 | MyD88                               |                                   | CCL2                                                                              | MAP3K1<br>MAPK8       |                |             |                                 | >10, ↓         |
| TLR8<br>TLR10        | HMGB1<br>LY96                       | IRAK1<br>UBE2N<br>NR2C2           | IL1A<br>CHUK<br>NFKBIL1<br>NFRKB                                                  | ELK1<br>MAP2K4<br>FOS |                | CXCL10      | RIPK2                           | >5, ↓<br>>4, ↓ |
| TLR3                 | PELI1,<br>TICAM2                    | IRAK2<br>PPARA<br>SITPEC<br>PPARA | IL12A<br>IFNB1<br>MAP3K7IP1<br>REL<br>CSF2                                        |                       | CLECSF9        | TBK1        |                                 | >3, ↓          |
| TLR6                 | CD14,<br>TOLLIP                     | MAP3K7<br>TRAF6                   | NFKB1<br>RELA<br>LTA<br>IL-6<br>IFNA1<br>NFKB2<br>IL-8<br>CSF3<br>IKBKB<br>MAP4K4 | MAPK8IP3              | IRF3           |             |                                 | >2, ↓          |
|                      | HSPA1A                              |                                   |                                                                                   |                       |                |             |                                 | >2, ↑          |

NOTE: Fold difference in gene expression between HepG2 transfectants expressing MAP4K4-A1 and control shRNA. Average results of three independent experiments are shown, *n*=3. The genes listed are those whose expression is changed at least 2-fold.

↑, upregulation; ↓, downregulation, relative to the control transfectants.
